# Supplementary material for: Ion exchange induced removal of Pb(ii) by MOF-derived magnetic inorganic sorbents
Source: Royal Society of Chemistry journal article supplement (doi:10.1039/c6nr00695g), 2016-01-01
Supplement: c6nr00695g1.pdf [file c6nr00695g1.pdf]

# Ion Exchange Induced Removal of Pb(II) by MOF-Derived Magnetic Inorganic Sorbents

Dezhi Chen<sup>a</sup>, Weisong Shen<sup>a</sup>, Shaolin Wu<sup>\*a</sup>, Caiqing Chen<sup>a</sup>, Xubiao Luo<sup>\*a</sup>, Lin Guo<sup>\*a,b</sup>

<sup>a</sup> Key Laboratory of Jiangxi Province for Persistent Pollutants Control and Resources Recycle,

School of Environmental and Chemical Engineering, Nanchang Hangkong University, Nanchang

330063, P. R. China

<sup>b</sup> Key Laboratory of Bio-Inspired Smart Interfacial Science and Technology of Ministry of

Education, School of Chemistry and Environment, Beihang University, Beijing 100191, P. R. China

\*Corresponding authors: Tel & Fax: 86(0)791 839 533 73

Email address: luoxubiao@nchu.edu.cn (X. Luo); 39008@nchu.edu.cn (S. Wu);

guolin@buaa.edu.cn (L. Guo)

## Supporting information

Table S1. Comparison of maximum adsorption Capacities ( $\text{mg g}^{-1}$ ) with various adsorbents for removal of Pb(II)

| Adsorbent sample                                           | Adsorption capacity ( $\text{mg g}^{-1}$ ) | Reference |
|------------------------------------------------------------|--------------------------------------------|-----------|
| $\text{Fe}_3\text{O}_4$                                    | 36.01                                      | 1         |
| amino-functionalized $\text{Fe}_3\text{O}_4@/\text{SiO}_2$ | 111.9                                      | 2         |
| $\text{ZnO}@/\text{SiO}_2@/\text{Fe}_3\text{O}_4/\text{C}$ | 54.6                                       | 3         |
| ZnO nanosheets                                             | 6.7                                        | 4         |
| ZnO nanoparticles                                          | 50.0                                       | 5         |
| Modified-ZnO nanopowders                                   | 61.2                                       | 6         |
| Grapheme-ZnO                                               | 23.42                                      | 7         |
| nano- $\text{TiO}_2$                                       | 30.8                                       | 8         |
| Nano Iron oxides                                           | 71.464                                     | 9         |
| Nano-CuO                                                   | 188.67                                     | 10        |
| Polyethersulfone/hydrous manganese dioxide                 | 204.1                                      | 11        |
| Modified inorganic mesoporous silica                       | 200.80                                     | 12        |
| Amino siloxane oligomer-linked graphene oxide              | 312.5                                      | 13        |
| PVA/PAA gel                                                | 194.99                                     | 14        |

|                                                       |        |           |
|-------------------------------------------------------|--------|-----------|
| trioctylmethyl ammonium<br>carboxymethylated chitosan | 143.3  | 15        |
| ZnO/ZnFe <sub>2</sub> O <sub>4</sub> /C               | 344.83 | this work |

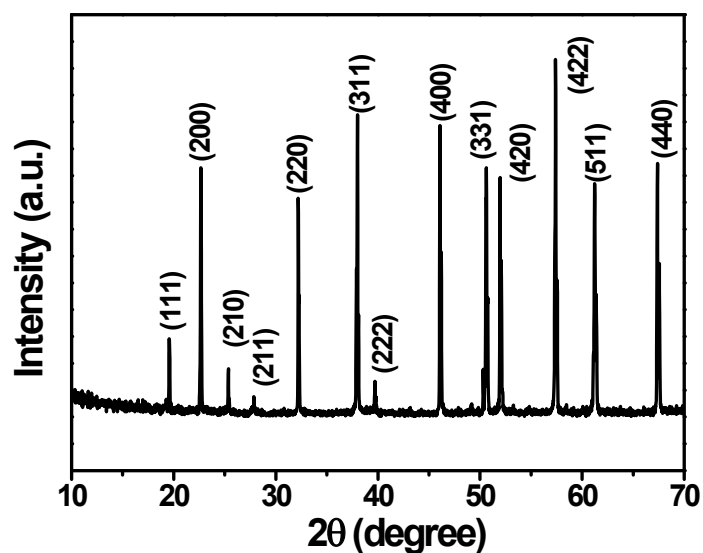

Figure S1. XRD pattern of Pb(NO<sub>3</sub>)<sub>2</sub>

Table S2. The intensity ratios of main diffraction peaks for ZnO and ZnFe<sub>2</sub>O<sub>4</sub> before and after Pb(II) adsorption according to the XRD patterns of ZnO/ZnFe<sub>2</sub>O<sub>4</sub>/C and ZnO/ZnFe<sub>2</sub>O<sub>4</sub>/C-Pb.

|                                            | ZnO                                    |                                        |                                        |                                        | ZnFe <sub>2</sub> O <sub>4</sub> /ZnO                                    |
|--------------------------------------------|----------------------------------------|----------------------------------------|----------------------------------------|----------------------------------------|--------------------------------------------------------------------------|
|                                            | I <sub>(100)</sub> /I <sub>(101)</sub> | I <sub>(002)</sub> /I <sub>(101)</sub> | I <sub>(102)</sub> /I <sub>(101)</sub> | I <sub>(112)</sub> /I <sub>(101)</sub> | I <sub>(311-ZnFe<sub>2</sub>O<sub>4</sub>)</sub> /I <sub>(101-ZnO)</sub> |
| ZnO/ZnFe <sub>2</sub> O <sub>4</sub> /C    | 0.728                                  | 0.405                                  | 0.172                                  | 0.191                                  | 0.393                                                                    |
| ZnO/ZnFe <sub>2</sub> O <sub>4</sub> /C-Pb | 0.758                                  | 0.390                                  | 0.174                                  | 0.190                                  | 0.472                                                                    |
|                                            | ZnFe <sub>2</sub> O <sub>4</sub>       |                                        |                                        |                                        |                                                                          |
|                                            | I <sub>(220)</sub> /I <sub>(311)</sub> | I <sub>(012)</sub> /I <sub>(311)</sub> |                                        |                                        |                                                                          |
| ZnO/ZnFe <sub>2</sub> O <sub>4</sub> /C    | 0.291                                  | 0.222                                  |                                        |                                        |                                                                          |
| ZnO/ZnFe <sub>2</sub> O <sub>4</sub> /C-Pb | 0.297                                  | 0.227                                  |                                        |                                        |                                                                          |

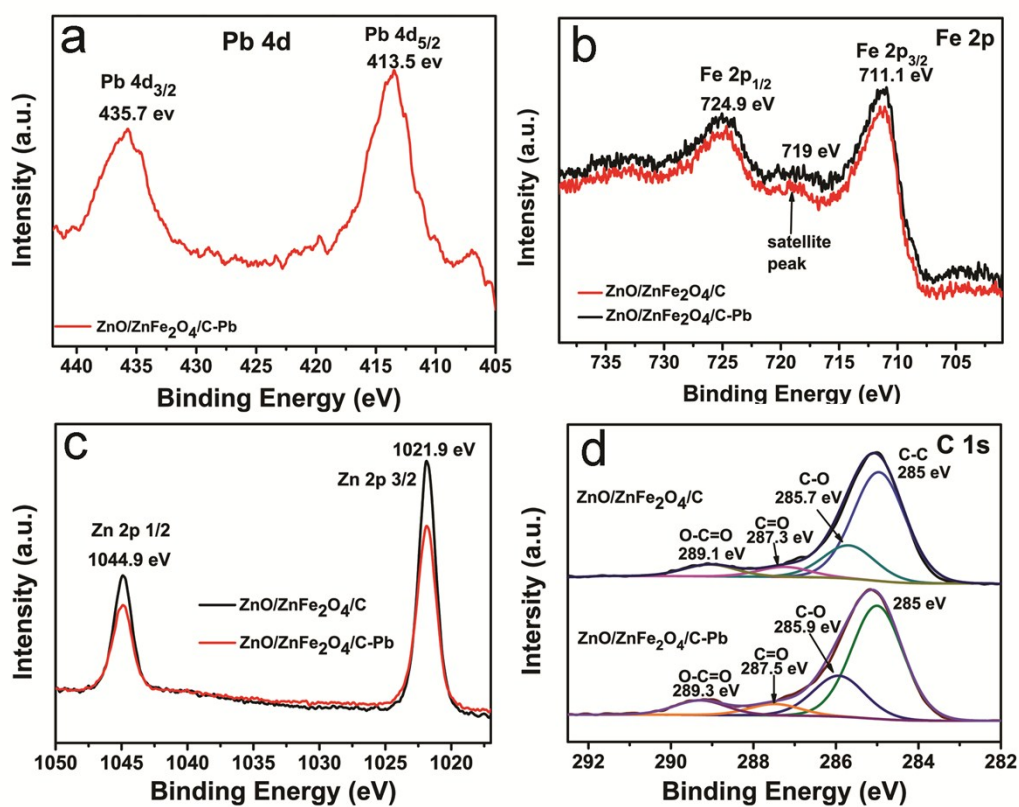

Figure S2. XPS spectra of ZnO/ZnFe<sub>2</sub>O<sub>4</sub>/C and ZnO/ZnFe<sub>2</sub>O<sub>4</sub>/C-Pb. (a) Pb 4d, (b) Fe 2p, (c) Zn 2p, (d) C 1s.

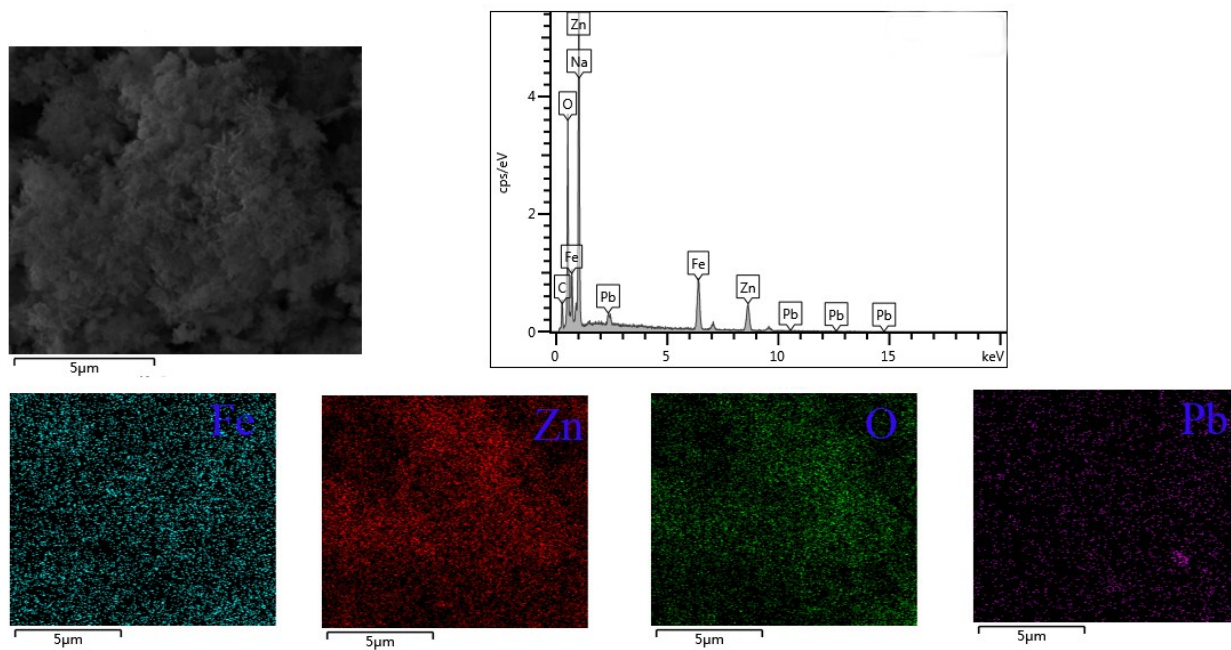

Figure S3. EDS and mapping images of ZnO/ZnFe<sub>2</sub>O<sub>4</sub>/C-Pb.

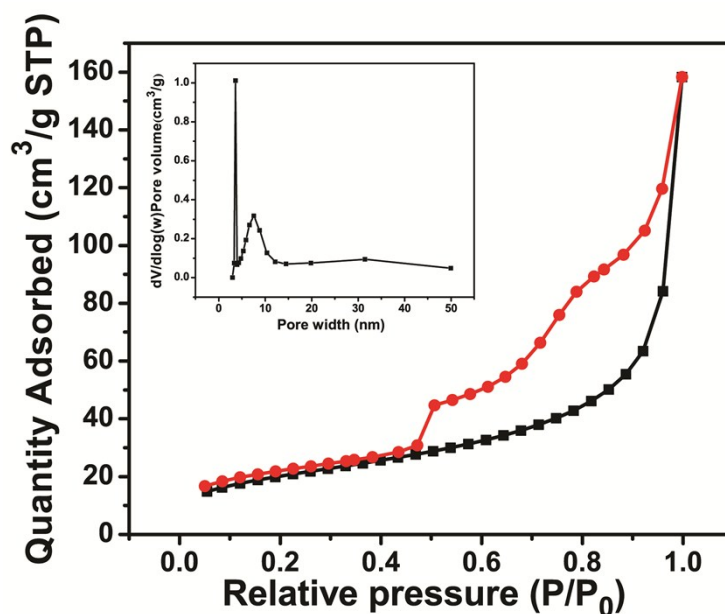

Figure S4. N<sub>2</sub> adsorption-desorption isotherm and the pore-size distribution curve of

ZnO/ZnFe<sub>2</sub>O<sub>4</sub>/C

#### Reference

1. N. N. Nassar, *Journal of hazardous materials*, 2010, **184**, 538-546.
2. J. Wang, S. Zheng, Y. Shao, J. Liu, Z. Xu and D. Zhu, *Journal of colloid and interface science*, 2010, **349**, 293-299.
3. X. M. Zhang, J. Y. Liu, S. J. Kelly, X. J. Huang and J. H. Liu, *Journal of Materials Chemistry A*, 2014, **2**, 11759-11767.
4. X. Ma, Y. Wang, M. Gao, H. Xu and G. Li, *Catalysis Today*, 2010, **158**, 459-463.
5. S. Mahdavi, M. Jalali and A. Afkhami, *Journal of Nanoparticle Research*, 2012, **14**.
6. S. Nekouei, F. Nekouei, I. Tyagi, S. Agarwal and V. K. Gupta, *Process Safety and Environmental Protection*, 2016, **99**, 175-185.
7. X. Zhao, B. Hu, J. Ye and Q. Jia, *Journal of Chemical & Engineering Data*, 2013, **58**, 2395-2401.
8. Z. Jin, H. Gao and L. Hu, *Rsc Advances*, 2015, **5**, 88520-88528.
9. C. Zhang, Z. Yu, G. Zeng, B. Huang, H. Dong, J. Huang, Z. Yang, J. Wei, L. Hu and Q. Zhang, *Chemical Engineering Journal*, 2016, **284**, 247-259.
10. L. Arfaoui, S. Kouass, H. Dhaouadi, R. Jebali and F. Touati, *Materials Research Bulletin*, 2015, **70**, 284-290.
11. R. Jamshidi Gohari, W. J. Lau, T. Matsuura, E. Halakoo and A. F. Ismail, *Separation and Purification Technology*, 2013, **120**, 59-68.
12. M. R. Awual, M. M. Hasan and A. Shahat, *Sensors and Actuators B: Chemical*, 2014, **203**, 854-863.
13. S. Luo, X. Xu, G. Zhou, C. Liu, Y. Tang and Y. Liu, *Journal of Hazardous Materials*, 2014, **274**, 145-155.
14. L. Chu, C. Liu, G. Zhou, R. Xu, Y. Tang, Z. Zeng and S. Luo, *Journal of Hazardous Materials*, 2015, **300**, 153-160.
15. H. Cui, J. Chen, H. Yang, W. Wang, Y. Liu, D. Zou, W. Liu and G. Men, *Chemical Engineering Journal*, 2013, **232**, 372-379.
